# Supplementary material for: The Impact of HR-HPV Infection on Women's Cognition, Psychology, and Behavior: A Qualitative Study
Source: Research Square preprint supplement (doi:10.21203/rs.3.rs-7580007/v1), 2025-11-19
Supplement: Supplementary file 1 [file 4bf15737d5f439c150250b28.docx]

Interview Outline

Hello, we are from Shanghai Jiao Tong University School of Medicine and are conducting a study on the adverse psychosocial states of patients with high-risk HPV and its impact on disease outcomes. We will conduct an interview with you regarding your psychological state. The content of this interview will be used for research purposes only. Thank you for your understanding and support.

****(I) Background Information****
(1) What is your name and age?
*Participants will later be divided into three groups for data analysis based on age (≤30 years old, 31-49 years old, ≥50 years old).
(2) When were you diagnosed with HR-HPV infection? What was the specific infection type? What do you think was the cause of your infection?
(3) Before being diagnosed with HR-HPV infection, were you aware of this disease? Through which channel did you learn about it? (e.g., relatives/friends, social media, health education lectures, etc.)
(4) Before being diagnosed with HR-HPV infection, had you taken any preventive measures? (e.g., HPV vaccination, etc.)

****(II) Psychological State****
(1) What were your initial thoughts when you were first diagnosed with HR-HPV infection?
*Guide the patient to focus on thoughts rather than emotions. (e.g., Why did I get infected with HR-HPV? I don’t have a history of risky sexual behavior, so why was I infected?)
(2) Can you describe the emotions you felt at that time? (e.g., shock, fear, anxiety, sadness, etc., and describe their intensity)
*Including: depression, anxiety, stress, decreased sleep quality, guilt, shame, self-disgust. Guidance may be provided if necessary.
(3) Did your emotions change over time? Why?

****(III) Coping Methods****
(1) How were you diagnosed with HPV infection? (Can guide toward physical discomfort aspects)
(2) Did you seek help from family or friends to cope with these negative emotions? (i.e., ask whether they informed their family/partner, and whether they felt too ashamed to talk about it)
(3) Did you seek help from professionals to address these negative emotions? (e.g., psychological counseling, etc.)

****(IV) Impact on Interpersonal Relationships**** (After informing partner, family, or friends—what were their attitudes?)
(1) Did the diagnosis of HR-HPV infection affect your relationship with your partner? (Consider sexual relations as well)
*e.g., Continued sexual activity may lead to partner infection; physical discomfort preventing sexual activity, etc.
(2) Did the diagnosis of HR-HPV infection affect your relationships with other family members?
(3) Did the diagnosis of HR-HPV infection affect your relationships with friends or colleagues?
*May need to categorize, e.g., close friends vs. casual friends; also consider whether they disclosed their HR-HPV status to others.
(4) Did you experience any concerns or challenges when needing to explain your HR-HPV infection to others?

****(V) Self-Impact****
(1) Did the diagnosis of HR-HPV infection affect your daily life? (Including both physical and psychological discomfort)
*Consider the impact of physical discomfort from HR-HPV infection itself on daily life, such as pain, itching, etc.
(2) Did the diagnosis of HR-HPV infection affect your self-esteem and confidence?
*Guide the question toward aspects like disease stigmatization and negative social perceptions; also consider whether gynecological examinations themselves affected the patient’s self-esteem.
